# Supplementary material
Source: PubMed Central journal article supplement (PMC9117495)

## Supplementary Figure S6

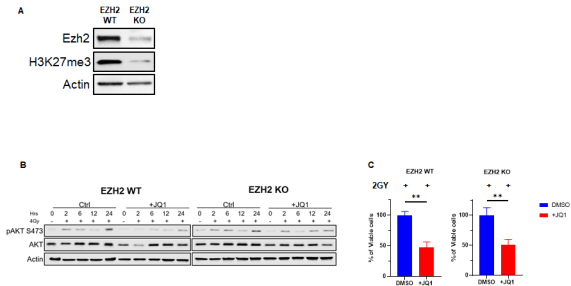

Supplement: NIHMS1793504-supplement-10.pdf [file NIHMS1793504-supplement-10.pdf]

# Supplementary Figure S7

**A**

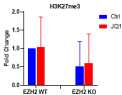

**B**

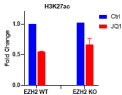

Supplement: NIHMS1793504-supplement-11.pdf [file NIHMS1793504-supplement-11.pdf]

## Supplementary Figure S8

### Group 3 Medulloblastoma

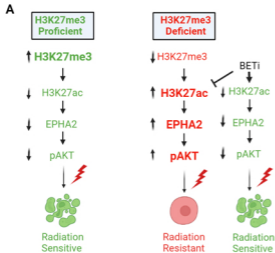

### Group 3 Medulloblastoma

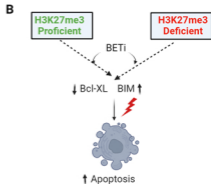

Supplement: NIHMS1793504-supplement-12.pdf [file NIHMS1793504-supplement-12.pdf]

# Supplementary Figure S1

**A**

|          |   | Myc |   |
|----------|---|-----|---|
|          |   | -   | + |
| H3K27me3 | - | 13  | 4 |
|          | + | 18  | 1 |

**B**

|          |   | Sex |   |
|----------|---|-----|---|
|          |   | ♂   | ♀ |
| H3K27me3 | - | 13  | 4 |
|          | + | 10  | 9 |

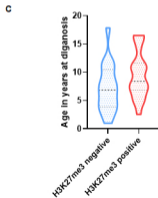

Supplement: NIHMS1793504-supplement-5.pdf [file NIHMS1793504-supplement-5.pdf]

# Supplementary Figure S2

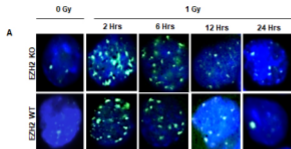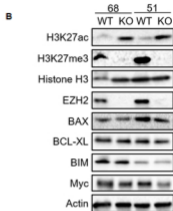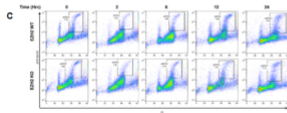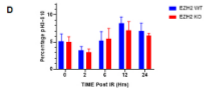

Supplement: NIHMS1793504-supplement-6.pdf [file NIHMS1793504-supplement-6.pdf]

# Supplementary Figure S3

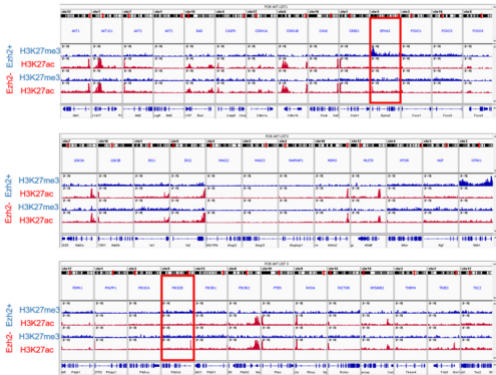

Supplement: NIHMS1793504-supplement-7.pdf [file NIHMS1793504-supplement-7.pdf]

## Supplementary Figure S4

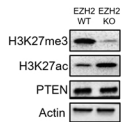

Supplement: NIHMS1793504-supplement-8.pdf [file NIHMS1793504-supplement-8.pdf]

## Supplementary Figure S5

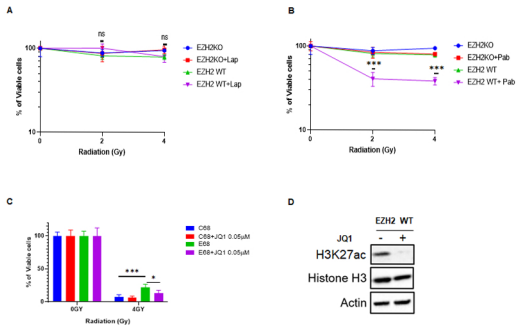

Supplement: NIHMS1793504-supplement-9.pdf [file NIHMS1793504-supplement-9.pdf]
